# Supplementary material for: Cross-modality Labeling Enables Noninvasive Capillary Quantification as a Sensitive Biomarker for Assessing Cardiovascular Risk
Source: PubMed Central journal article supplement — Ophthalmol Sci. 2023 Dec 5;4(3):100441. doi: 10.1016/j.xops.2023.100441 (PMC10899028; doi:10.1016/j.xops.2023.100441), 2023-12-05

Supplementary Figure S1. Flow chart of the study. FFA=Fundus Fluorescein Angiography.

CF=Color Fundus. a. Vessel segmentation model development.

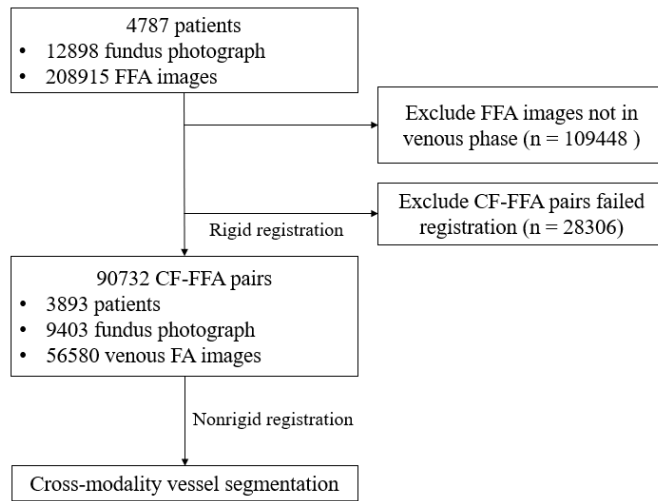

b. External validation

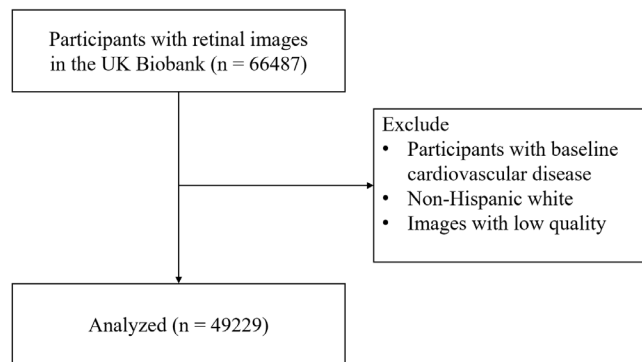

Supplement: mmc1.pdf [file mmc1.pdf]
