# Supplementary material for: Cross-modality Labeling Enables Noninvasive Capillary Quantification as a Sensitive Biomarker for Assessing Cardiovascular Risk
Source: PubMed Central journal article supplement — Ophthalmol Sci. 2023 Dec 5;4(3):100441. doi: 10.1016/j.xops.2023.100441 (PMC10899028; doi:10.1016/j.xops.2023.100441), 2023-12-05

Supplementary Figure S2. Screenshots of manual-labeling procedure. The grader switches between the color fundus interface (first column) and FFA interface (second column) and annotates vessels based on both of color fundus and FFA. FFA=Fundus Fluorescein Angiography.

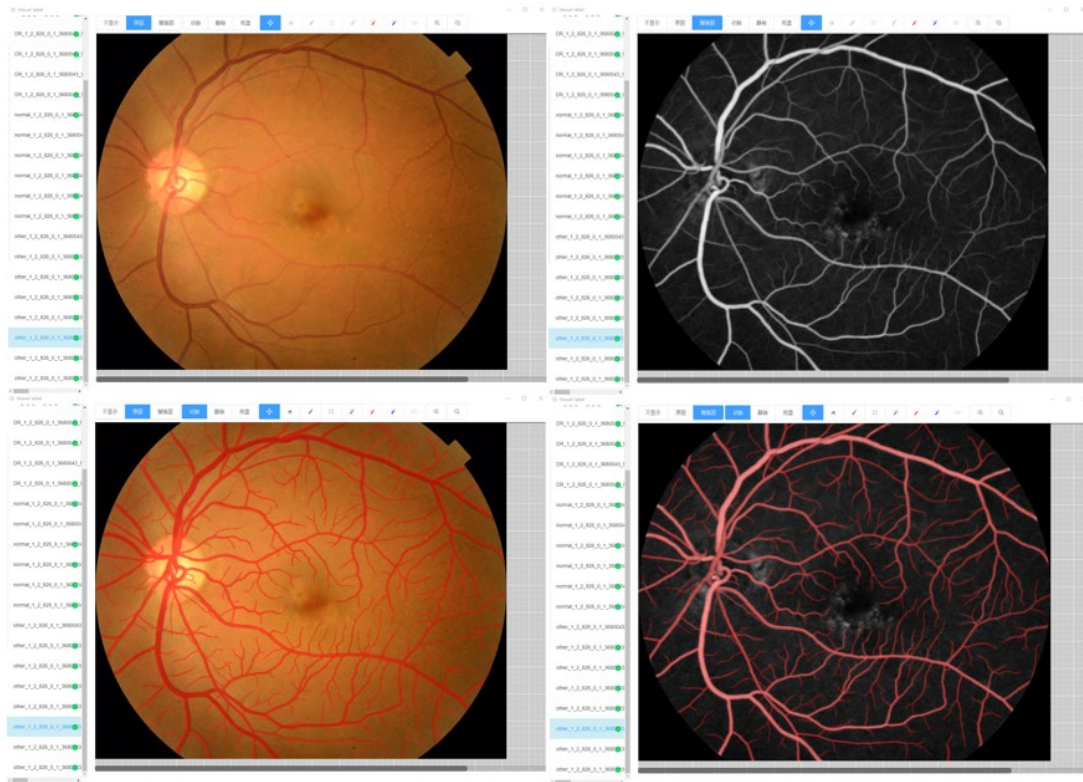

Supplement: mmc2.pdf [file mmc2.pdf]
