# Supplementary material for: Cross-modality Labeling Enables Noninvasive Capillary Quantification as a Sensitive Biomarker for Assessing Cardiovascular Risk
Source: PubMed Central journal article supplement — Ophthalmol Sci. 2023 Dec 5;4(3):100441. doi: 10.1016/j.xops.2023.100441 (PMC10899028; doi:10.1016/j.xops.2023.100441), 2023-12-05

Supplementary Figure S3. Generalizability on 7 public datasets. Green for manual labeling, red for model prediction, yellow for agreement, CLAHE=Contrast Limited Adaptive Histogram Equalization.

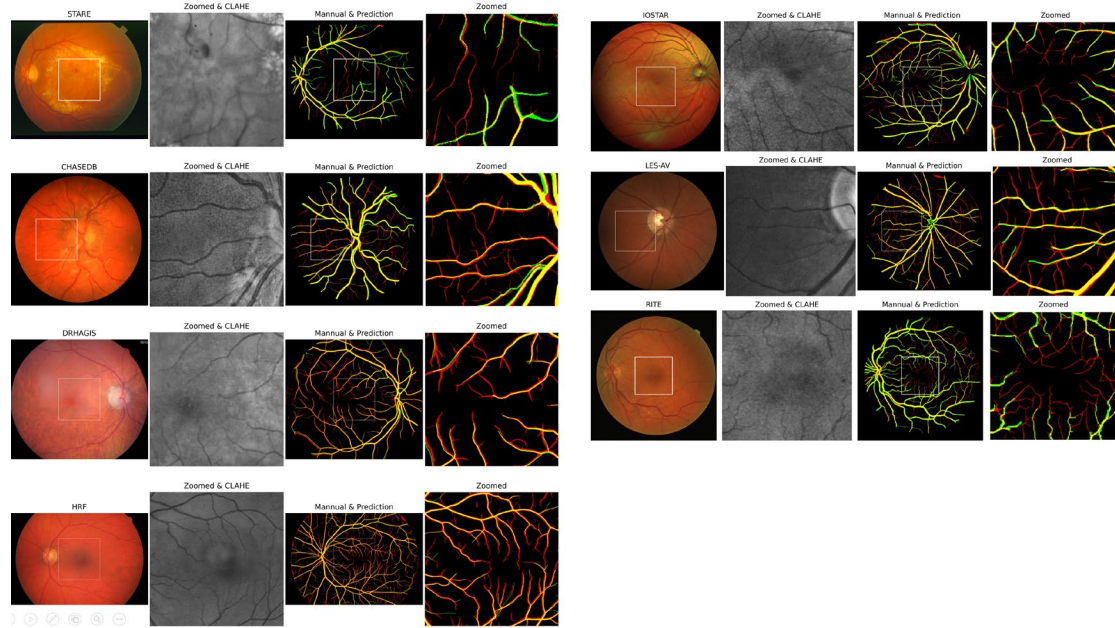

Supplement: mmc3.pdf [file mmc3.pdf]
