# Supplementary material for: Cross-modality Labeling Enables Noninvasive Capillary Quantification as a Sensitive Biomarker for Assessing Cardiovascular Risk
Source: PubMed Central journal article supplement — Ophthalmol Sci. 2023 Dec 5;4(3):100441. doi: 10.1016/j.xops.2023.100441 (PMC10899028; doi:10.1016/j.xops.2023.100441), 2023-12-05

Supplementary Figure S4. Association of retinal vessel skeleton density (VSD, in pixel unit) with numerical cardiovascular disease risk factors. Pink denotes artery, blue denotes vein. Model1 unadjusted, Model2 adjusted for age and gender. VSD=Vessel Skeleton Density, CI=Confidence Interval, BMI=Body Mass Index, HDL=High Density Lipoprotein, LDL=Low Density Lipoprotein, HbA1c=glycosylated hemoglobin, SBP=Systolic Blood Pressure, DBP=Diastolic Blood Pressure.

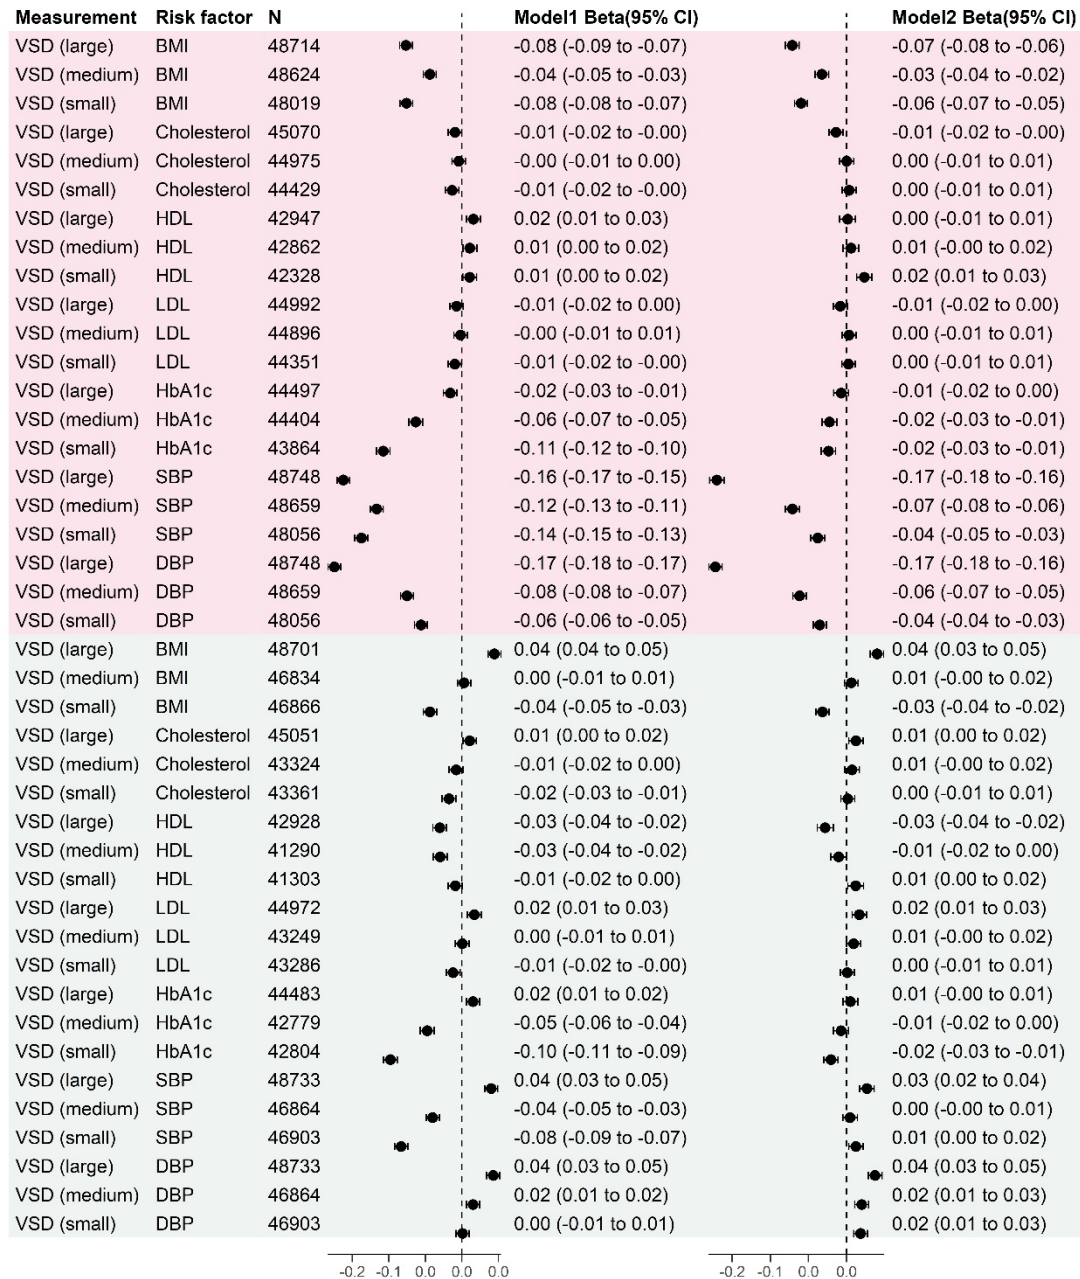

Supplement: mmc4.pdf [file mmc4.pdf]
