# Supplementary material for: Cross-modality Labeling Enables Noninvasive Capillary Quantification as a Sensitive Biomarker for Assessing Cardiovascular Risk
Source: PubMed Central journal article supplement — Ophthalmol Sci. 2023 Dec 5;4(3):100441. doi: 10.1016/j.xops.2023.100441 (PMC10899028; doi:10.1016/j.xops.2023.100441), 2023-12-05

Supplementary Figure S5. Association of retinal vessel skeleton density (VSD, in pixel unit) in different retinal region (macular region and other region) with numerical cardiovascular risk factors. Pink denotes artery, blue denotes vein. Model1 unadjusted, Model2 adjusted for age and gender. VSD=Vessel Skeleton Density, CI=Confidence Interval, BMI=Body Mass Index, HDL=High Density Lipoprotein, LDL=Low Density Lipoprotein, HbA1c=glycosylated hemoglobin, SBP=Systolic Blood Pressure, DBP=Diastolic Blood Pressure.

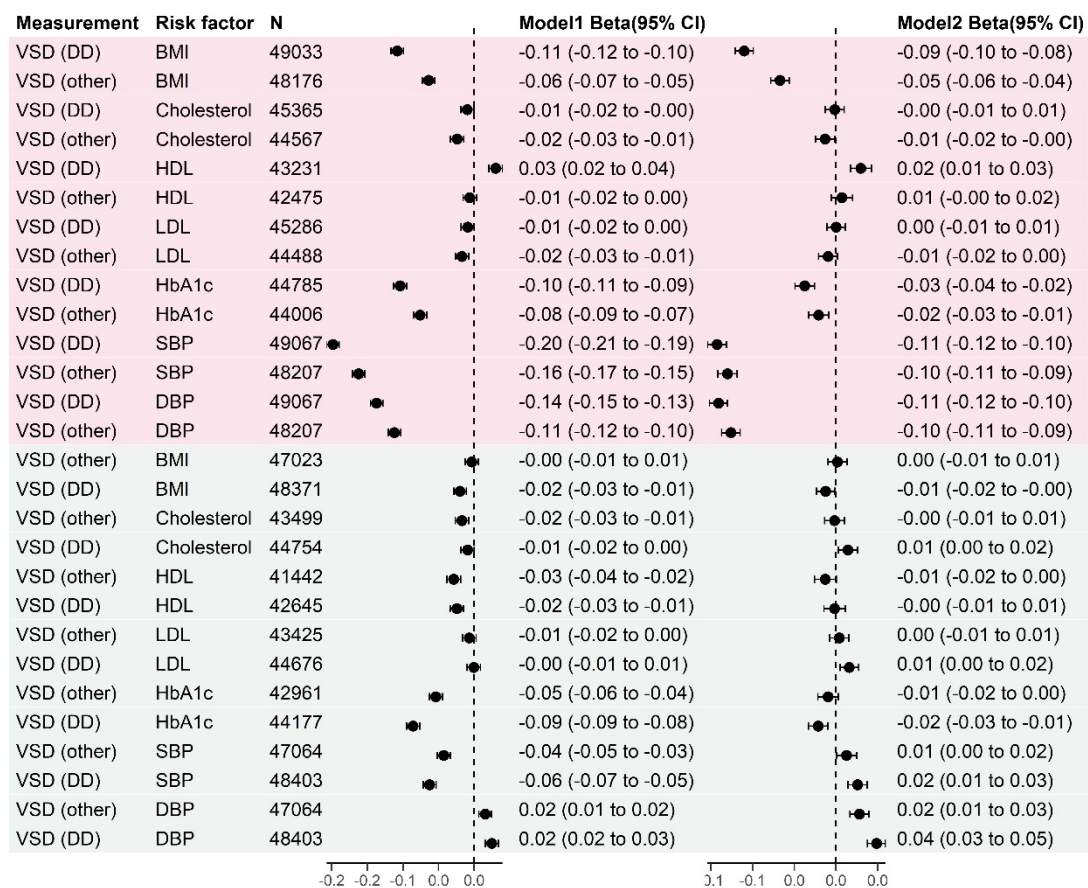

Supplement: mmc5.pdf [file mmc5.pdf]
