# Supplementary material for: Cross-modality Labeling Enables Noninvasive Capillary Quantification as a Sensitive Biomarker for Assessing Cardiovascular Risk
Source: PubMed Central journal article supplement — Ophthalmol Sci. 2023 Dec 5;4(3):100441. doi: 10.1016/j.xops.2023.100441 (PMC10899028; doi:10.1016/j.xops.2023.100441), 2023-12-05

Supplementary Figure S6. Association of artery to vein ratio (AVR) with numerical cardiovascular disease risk factors. Model1 unadjusted, Model2 adjusted for age and gender. VSD=Vessel Skeleton Density, CI=Confidence Interval, BMI=Body Mass Index, HDL=High Density Lipoprotein, LDL=Low Density Lipoprotein, HbA1c=glycosylated hemoglobin, SBP=Systolic Blood Pressure, DBP=Diastolic Blood Pressure

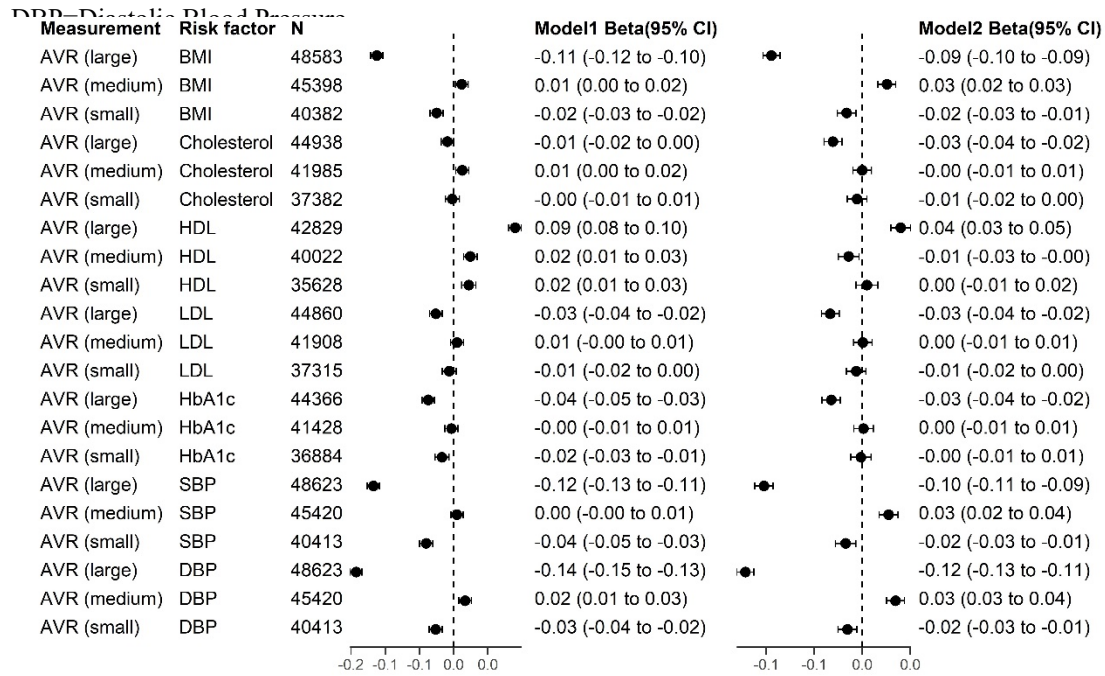

Supplement: mmc6.pdf [file mmc6.pdf]
