# Supplementary material for: Cross-modality Labeling Enables Noninvasive Capillary Quantification as a Sensitive Biomarker for Assessing Cardiovascular Risk
Source: PubMed Central journal article supplement — Ophthalmol Sci. 2023 Dec 5;4(3):100441. doi: 10.1016/j.xops.2023.100441 (PMC10899028; doi:10.1016/j.xops.2023.100441), 2023-12-05

Supplementary Figure S7. Association of vessel skeleton density (VSD) with categorical cardiovascular risk factors. Pink denotes artery, blue denotes vein. Model1 unadjusted, Model2 adjusted for age and gender. OR=Odds Ratio. VSD=Vessel Skeleton Density, CI=Confidence Interval

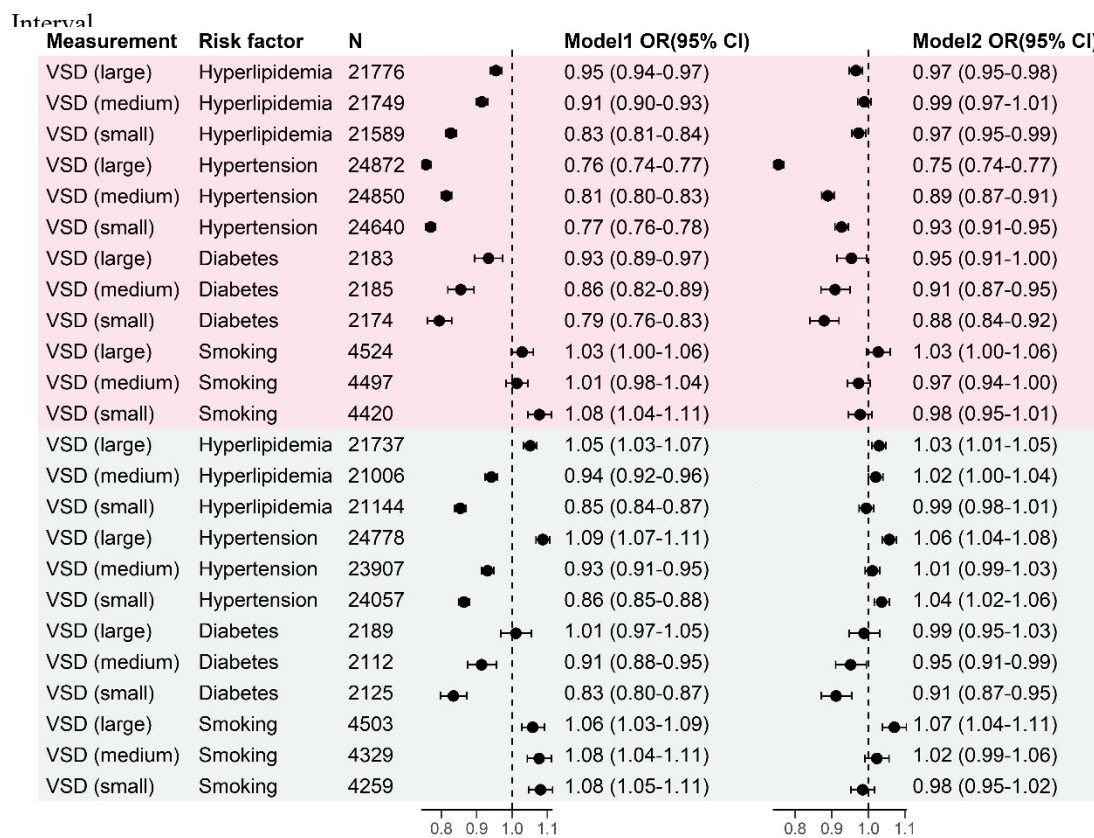

Supplement: mmc7.pdf [file mmc7.pdf]
