# Supplementary material for: Cross-modality Labeling Enables Noninvasive Capillary Quantification as a Sensitive Biomarker for Assessing Cardiovascular Risk
Source: PubMed Central journal article supplement — Ophthalmol Sci. 2023 Dec 5;4(3):100441. doi: 10.1016/j.xops.2023.100441 (PMC10899028; doi:10.1016/j.xops.2023.100441), 2023-12-05

Supplementary Figure S8. Association of retinal vessel skeleton density (VSD) in different retinal region (macular region and other region) with categorical cardiovascular risk factors. Pink denotes artery, blue denotes vein. Model1 unadjusted, Model2 adjusted for age and gender. VSD=Vessel Skeleton Density, CI=Confidence Interval, DD=1 Disc Diameter from the fovea, OR=Odds Ratio.

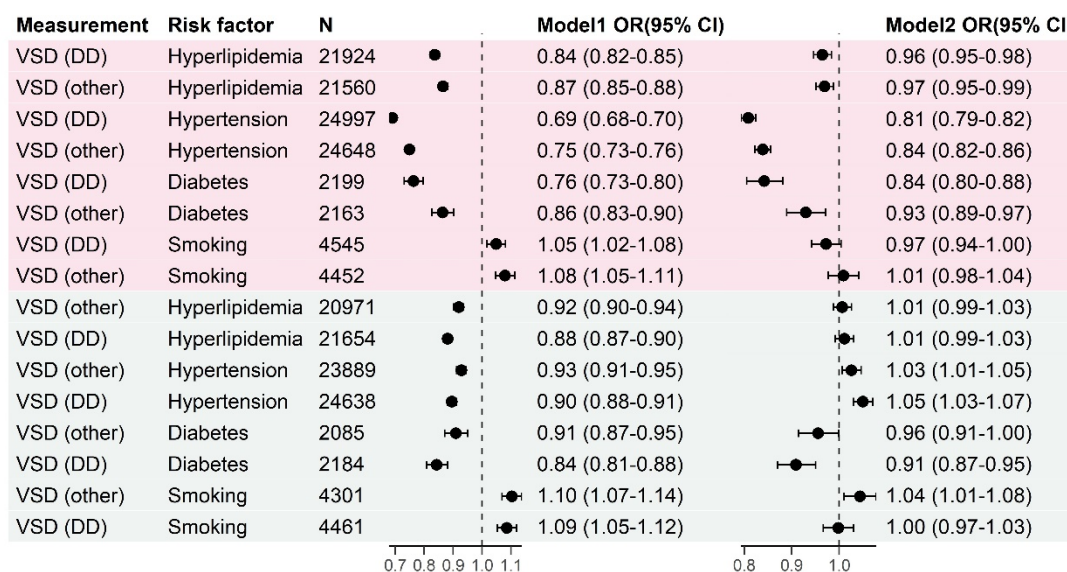

Supplement: mmc8.pdf [file mmc8.pdf]
