# Supplementary material for: Cross-modality Labeling Enables Noninvasive Capillary Quantification as a Sensitive Biomarker for Assessing Cardiovascular Risk
Source: PubMed Central journal article supplement — Ophthalmol Sci. 2023 Dec 5;4(3):100441. doi: 10.1016/j.xops.2023.100441 (PMC10899028; doi:10.1016/j.xops.2023.100441), 2023-12-05

Supplementary Figure S9. Association of artery to vein ratio (AVR) with categorical cardiovascular disease risk factors. Model1 unadjusted, Model2 adjusted for age and gender. AVR=Arteriolar-to-Venular Ratio, CI=Confidence Interval, OR=Odds Ratio

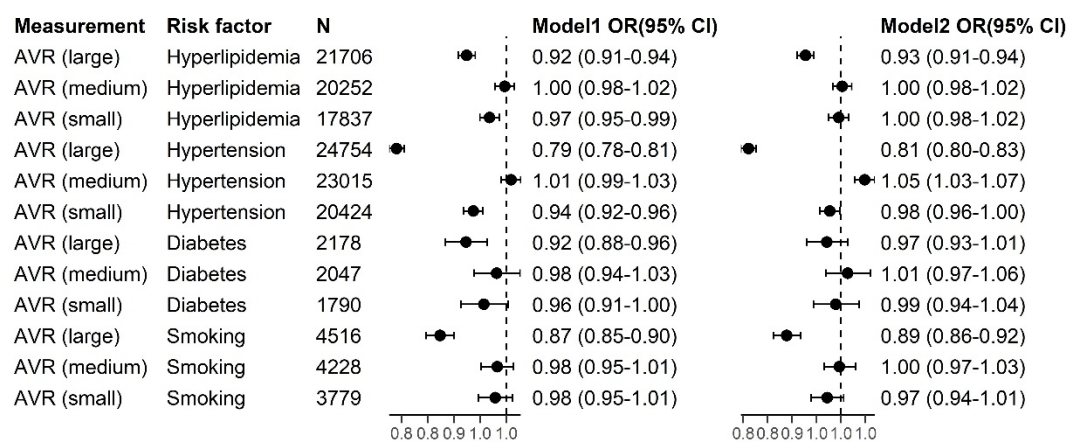

Supplement: mmc9.pdf [file mmc9.pdf]
