# Supplementary material for: Cross-modality Labeling Enables Noninvasive Capillary Quantification as a Sensitive Biomarker for Assessing Cardiovascular Risk
Source: PubMed Central journal article supplement — Ophthalmol Sci. 2023 Dec 5;4(3):100441. doi: 10.1016/j.xops.2023.100441 (PMC10899028; doi:10.1016/j.xops.2023.100441), 2023-12-05
Supplement: mmc10.pdf [file mmc10.pdf]

Table S1. Measurement characteristics stratified by gender.

| Measurement                 | Total (n = 49229)          | Female (n = 27366)         | Male (n = 21863)           | p       |
|-----------------------------|----------------------------|----------------------------|----------------------------|---------|
| <b>Artery</b>               |                            |                            |                            |         |
| AVR (large), mean $\pm$ SD  | 0.88 $\pm$ 0.04            | 0.89 $\pm$ 0.04            | 0.88 $\pm$ 0.04            | < 0.001 |
| AVR (medium), mean $\pm$ SD | 0.95 $\pm$ 0.02            | 0.96 $\pm$ 0.02            | 0.95 $\pm$ 0.02            | < 0.001 |
| AVR (small), mean $\pm$ SD  | 0.97 $\pm$ 0.02            | 0.97 $\pm$ 0.02            | 0.97 $\pm$ 0.02            | < 0.001 |
| VSD (large), Median (IQR)   | 1309.14 (1091, 1507.26)    | 1318.09 (1101.24, 1516.61) | 1296.41 (1077.79, 1495.72) | < 0.001 |
| VSD (medium), Median (IQR)  | 1225.07 (989.36, 1453.19)  | 1236.38 (999.83, 1464.94)  | 1211.74 (976.38, 1437.64)  | < 0.001 |
| VSD (small), Median (IQR)   | 1033.79 (579.52, 1428.98)  | 1043.7 (590.45, 1431.65)   | 1022.18 (566.41, 1425.91)  | < 0.001 |
| <b>Vein</b>                 |                            |                            |                            |         |
| AVR (large), mean $\pm$ SD  | 0.88 $\pm$ 0.04            | 0.89 $\pm$ 0.04            | 0.88 $\pm$ 0.04            | < 0.001 |
| AVR (medium), mean $\pm$ SD | 0.95 $\pm$ 0.02            | 0.96 $\pm$ 0.02            | 0.95 $\pm$ 0.02            | < 0.001 |
| AVR (small), mean $\pm$ SD  | 0.97 $\pm$ 0.02            | 0.97 $\pm$ 0.02            | 0.97 $\pm$ 0.02            | < 0.001 |
| VSD (large), Median (IQR)   | 1398.54 (1218.09, 1572.3)  | 1391.17 (1213.36, 1564.09) | 1407.82 (1224.2, 1582.86)  | < 0.001 |
| VSD (medium), Median (IQR)  | 1393.39 (1103.81, 1634.06) | 1384.36 (1091.43, 1625.3)  | 1404.79 (1122.04, 1647.64) | < 0.001 |
| VSD (small), Median (IQR)   | 1112.11 (662.04, 1504.93)  | 1107.67 (663.66, 1493.14)  | 1118.04 (660.34, 1518.92)  | 0.074   |

AVR=Arteriolar-to-Venular diameter Ratio. VSD=Vessel Skeleton Density. IQR=Inter Quartile Range. SD=Standard Deviation.

P-value for trend was examined by fitting a linear model for the risk categories and retinal measurements.
